# Supplementary material
Source: PubMed Central journal article supplement (PMC7297441)
Supplement: supplementary_table_pzz190.pdf [file supplementary_table_pzz190.pdf]

| Males   |      | Control during movement |      |      | Fine motor |      |      | General coordination |      |      | Total DCDQ |       |      |
|---------|------|-------------------------|------|------|------------|------|------|----------------------|------|------|------------|-------|------|
| (age)   | N    | M                       | SD   | SE   | M          | SD   | SE   | M                    | SD   | SE   | M          | SD    | SE   |
| (5-6)   | 1757 | 15.91                   | 5.39 | 0.13 | 8.22       | 4.28 | 0.10 | 11.21                | 4.17 | 0.10 | 35.34      | 11.36 | 0.27 |
| (6-7)   | 1081 | 16.23                   | 5.38 | 0.16 | 9.48       | 4.44 | 0.14 | 11.11                | 4.05 | 0.12 | 36.82      | 11.33 | 0.34 |
| (7-8)   | 1027 | 16.42                   | 5.62 | 0.18 | 9.91       | 4.35 | 0.14 | 10.89                | 3.96 | 0.12 | 37.23      | 11.71 | 0.37 |
| (8-9)   | 973  | 16.59                   | 5.68 | 0.18 | 10.02      | 4.28 | 0.14 | 10.90                | 4.00 | 0.13 | 37.51      | 11.53 | 0.37 |
| (9-10)  | 926  | 17.15                   | 5.99 | 0.20 | 9.89       | 4.54 | 0.15 | 10.97                | 4.27 | 0.14 | 38.02      | 12.23 | 0.40 |
| (10-11) | 855  | 16.58                   | 5.93 | 0.20 | 9.94       | 4.38 | 0.15 | 10.95                | 4.22 | 0.14 | 37.47      | 12.11 | 0.41 |
| (11-12) | 712  | 16.89                   | 6.11 | 0.23 | 9.82       | 4.23 | 0.16 | 11.04                | 4.38 | 0.16 | 37.75      | 12.44 | 0.47 |
| (12-13) | 659  | 17.01                   | 6.04 | 0.24 | 10.16      | 4.42 | 0.17 | 10.97                | 4.35 | 0.17 | 38.15      | 12.12 | 0.47 |
| (13-14) | 603  | 16.74                   | 6.35 | 0.26 | 9.72       | 4.39 | 0.18 | 10.74                | 4.43 | 0.18 | 37.21      | 12.90 | 0.53 |
| (14-15) | 516  | 16.74                   | 6.27 | 0.28 | 9.99       | 4.41 | 0.19 | 10.87                | 4.40 | 0.19 | 37.60      | 12.59 | 0.55 |

| Females |     | Control during movement |      |      | Fine motor |      |      | General coordination |      |      | Total DCDQ |       |      |
|---------|-----|-------------------------|------|------|------------|------|------|----------------------|------|------|------------|-------|------|
| (age)   | N   | M                       | SD   | SE   | M          | SD   | SE   | M                    | SD   | SE   | M          | SD    | SE   |
| (5-6)   | 444 | 16.08                   | 5.42 | 0.26 | 8.89       | 4.49 | 0.21 | 11.30                | 4.24 | 0.20 | 36.27      | 11.76 | 0.56 |
| (6-7)   | 257 | 16.06                   | 5.64 | 0.35 | 9.95       | 4.66 | 0.29 | 11.53                | 4.46 | 0.28 | 37.54      | 12.63 | 0.79 |
| (7-8)   | 240 | 16.55                   | 5.65 | 0.36 | 10.44      | 4.37 | 0.28 | 11.15                | 4.46 | 0.29 | 38.14      | 12.10 | 0.78 |
| (8-9)   | 224 | 16.32                   | 5.67 | 0.38 | 10.41      | 4.20 | 0.28 | 10.86                | 3.97 | 0.26 | 37.58      | 11.67 | 0.78 |
| (9-10)  | 190 | 16.82                   | 5.94 | 0.43 | 10.50      | 4.49 | 0.33 | 11.13                | 4.20 | 0.30 | 38.45      | 12.24 | 0.89 |
| (10-11) | 169 | 16.89                   | 5.71 | 0.44 | 11.25      | 4.41 | 0.34 | 11.50                | 4.40 | 0.34 | 39.63      | 12.32 | 0.95 |
| (11-12) | 165 | 16.59                   | 5.80 | 0.45 | 11.10      | 4.66 | 0.36 | 10.86                | 4.35 | 0.34 | 38.55      | 12.58 | 0.98 |
| (12-13) | 170 | 16.86                   | 5.98 | 0.46 | 11.37      | 4.52 | 0.35 | 11.11                | 4.54 | 0.35 | 39.35      | 12.89 | 0.99 |
| (13-14) | 134 | 17.22                   | 6.37 | 0.55 | 12.13      | 5.00 | 0.43 | 11.66                | 4.75 | 0.41 | 41.00      | 14.03 | 1.21 |
| (14-15) | 143 | 17.12                   | 6.05 | 0.51 | 12.43      | 4.66 | 0.39 | 11.31                | 4.16 | 0.35 | 40.86      | 12.20 | 1.02 |
