# Supplementary material
Source: PubMed Central journal article supplement (PMC7297441)

# DCDQ Final Score Across Age Ranges

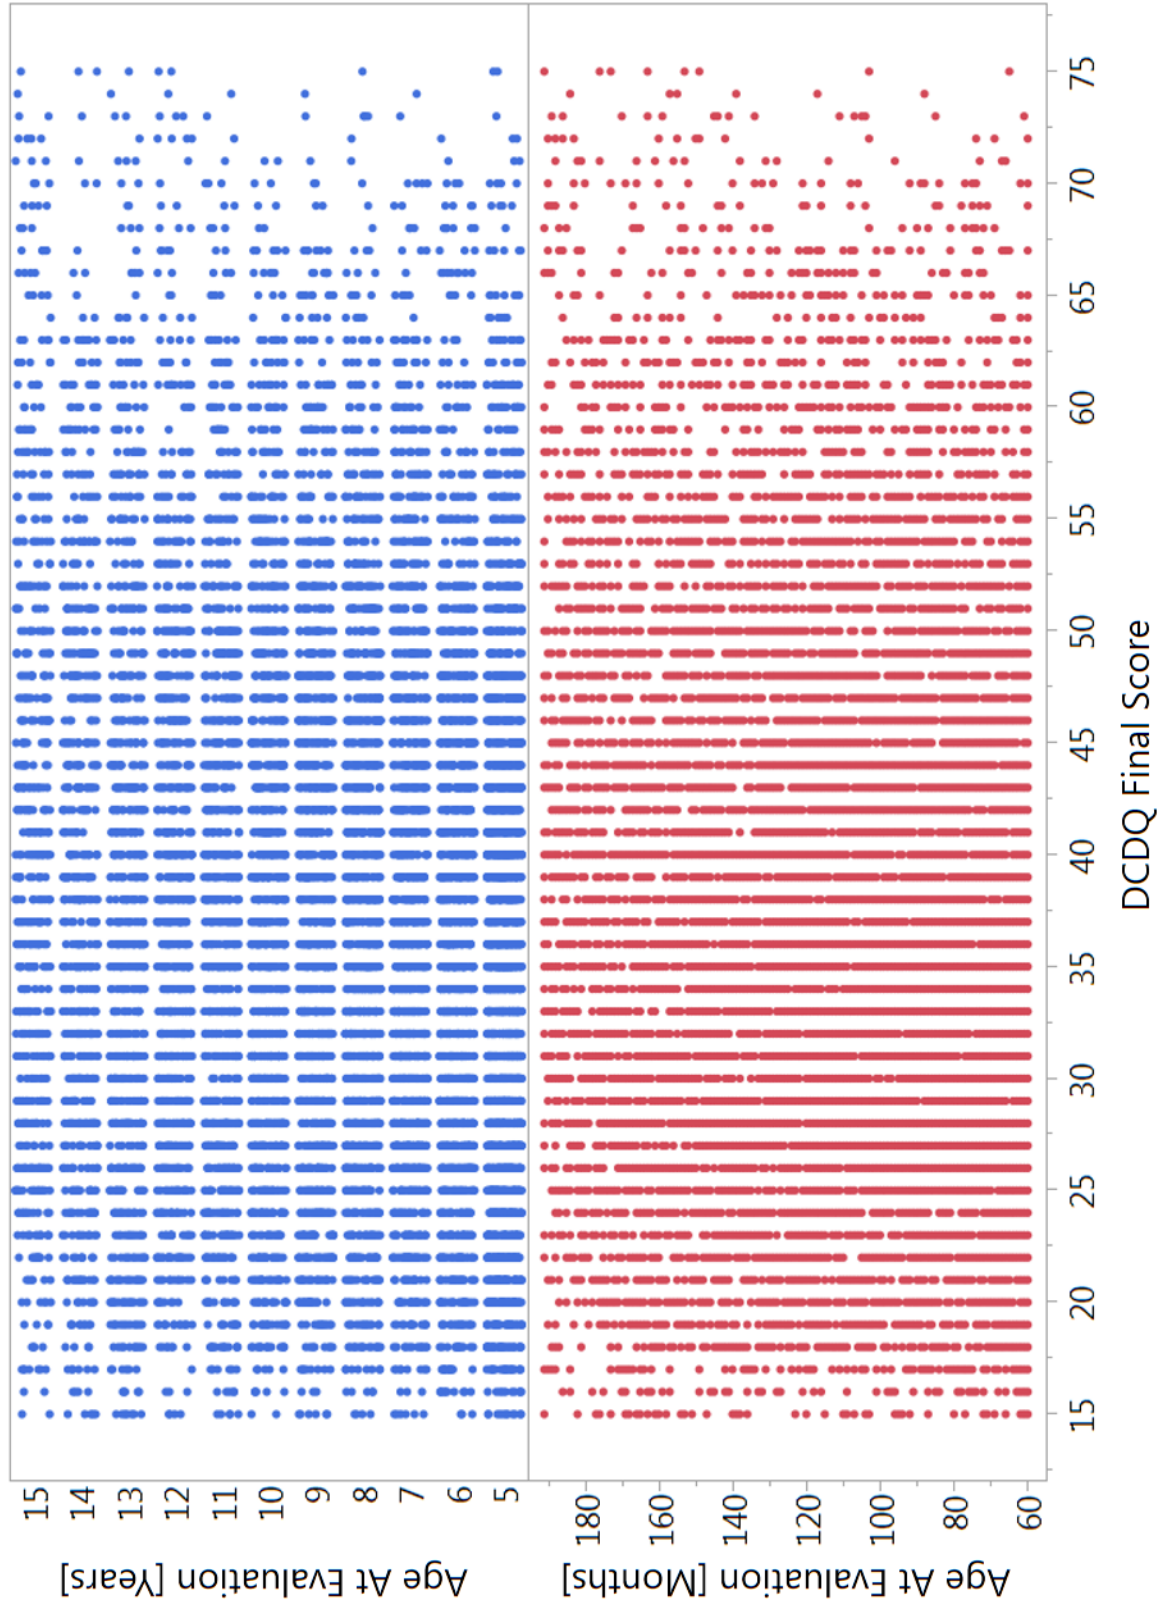

Supplement: supplementary_fig_pzz190.pdf [file supplementary_fig_pzz190.pdf]
